# Supplementary material
Source: bioRxiv or medRxiv preprint supplement (https://www.biorxiv.org/highwire/filestream/58921/field_highwire_adjunct_files/1/194084-2.pdf)
Supplement: Supplementary file [file 194084-2.pdf]

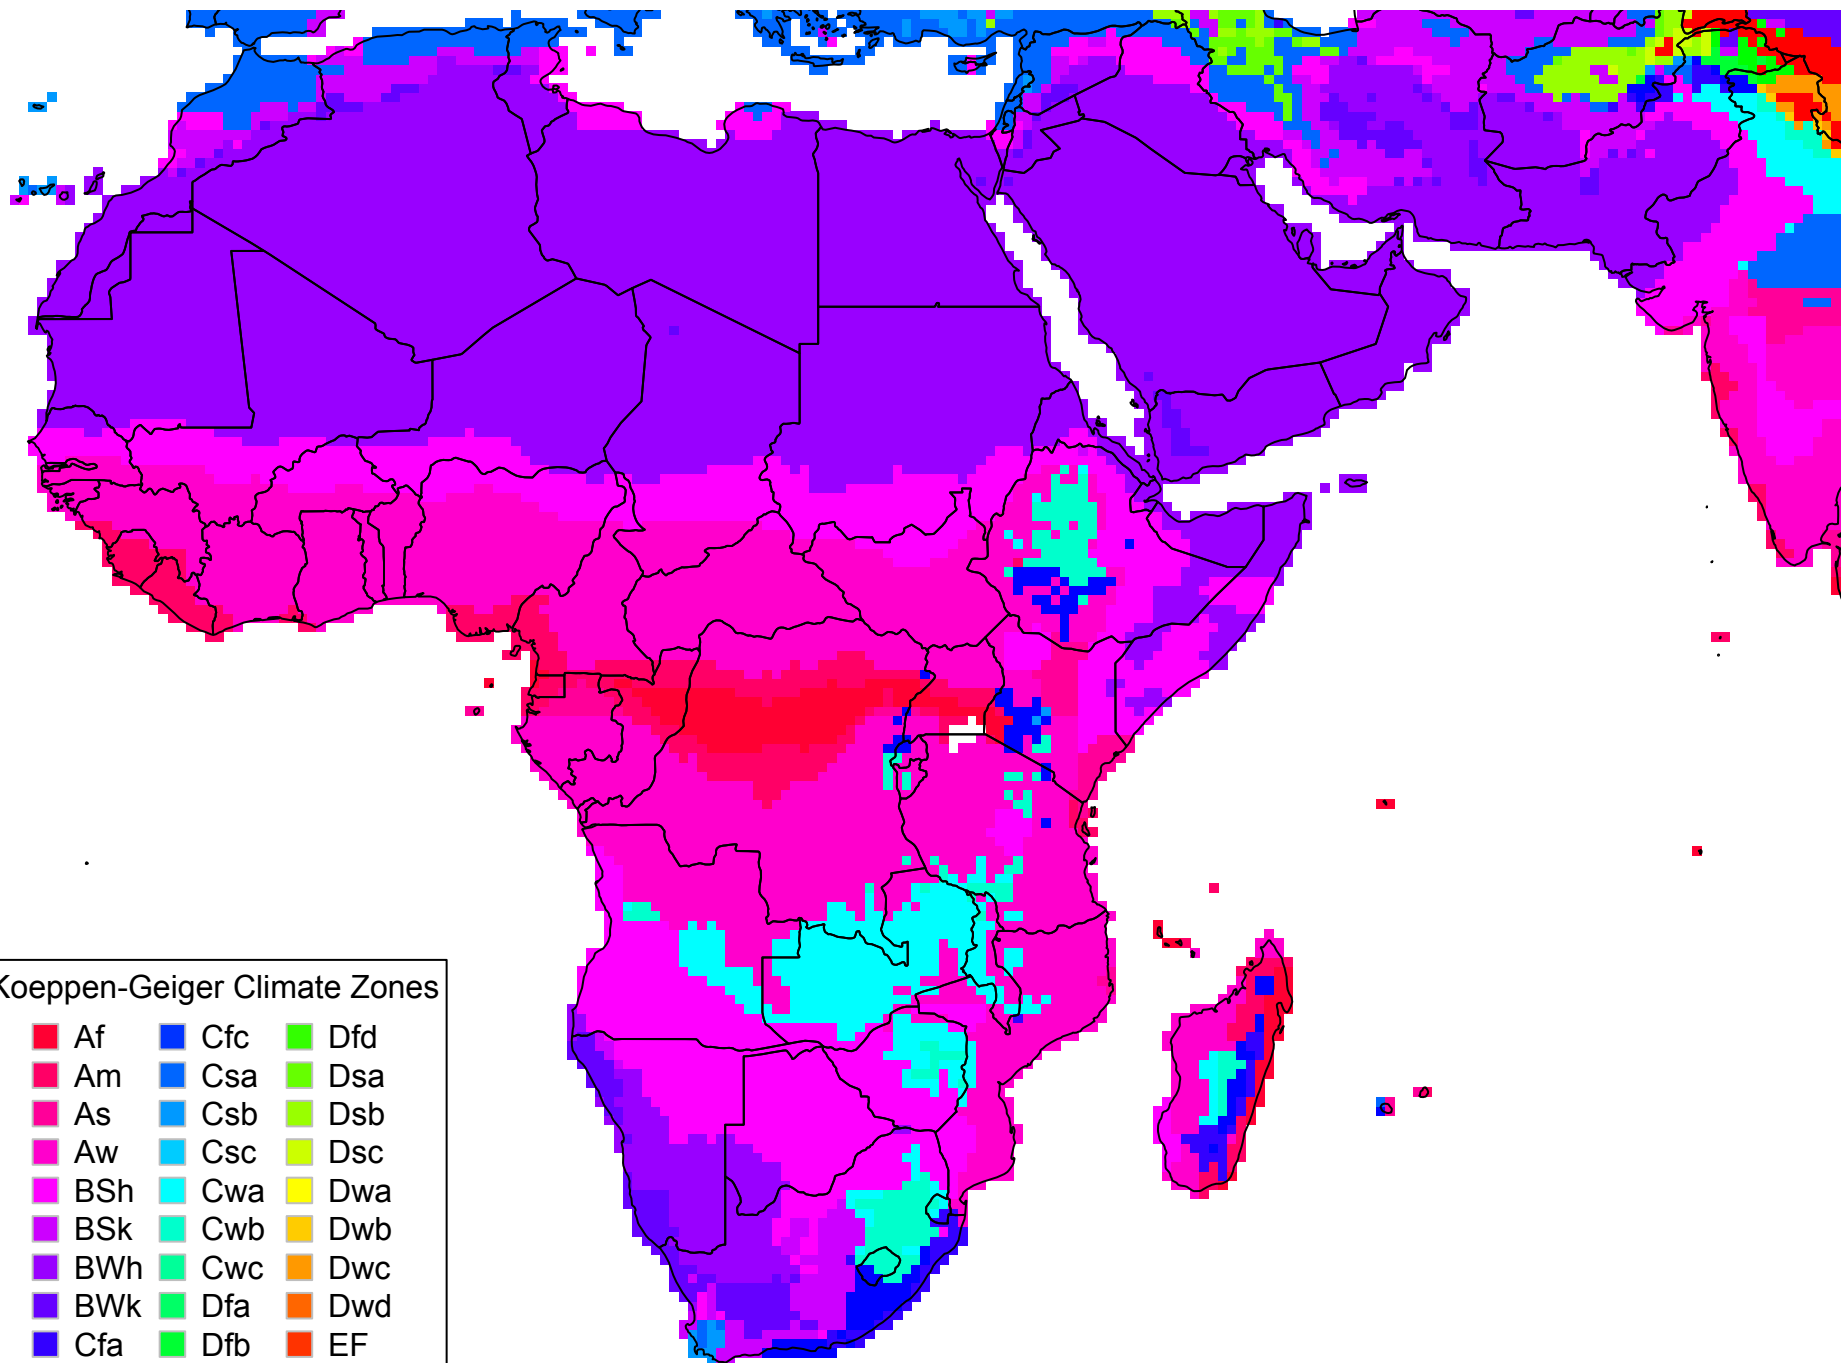

Koeppen-Geiger Climate Zones

|     |     |     |
|-----|-----|-----|
| Af  | Cfc | Dfd |
| Am  | Csa | Dsa |
| As  | Csb | Dsb |
| Aw  | Csc | Dsc |
| BSh | Cwa | Dwa |
| BSk | Cwb | Dwb |
| BWh | Cwc | Dwc |
| BWk | Dfa | Dwd |
| Cfa | Dfb | EF  |
| Cfb | Dfc | ET  |
